# Supplementary material for: Selective hydrodeoxygenation of 5-hydroxymethylfurfural to 2,5-dimethylfuran on Ru–MoOx/C catalysts
Source: Royal Society of Chemistry journal article supplement (doi:10.1039/c7ra00605e), 2017-01-01
Supplement: c7ra00605e1.pdf [file c7ra00605e1.pdf]

**Electronic Supplementary Material (ESI) for RSC Advances.**

**This journal is © The Royal Society of Chemistry 2016**

## **Supplementary data**

### **Selective hydrodeoxygenation of 5-hydroxymethylfurfural to 2, 5-dimethylfuran on Ru-MoOx/C catalysts**

Yue Yang<sup>a</sup>, Qiyang Liu<sup>\*,b</sup>, Dan Li<sup>b</sup>, Jin Tan<sup>b</sup>, Qi Zhang<sup>b</sup>, Chenguang Wang<sup>b</sup>, Longlong Ma<sup>\*,b</sup>

*<sup>a</sup>Department of Chemistry, University of Science and Technology of China, Hefei 230026, P. R. China*

*<sup>b</sup>Key Laboratory of Renewable Energy, Guangzhou Institute of Energy Conversion, Chinese Academy of Sciences, Guangzhou 510640, P. R. China.*

*Corresponding author: mall@ms.giec.ac.cn*

(Longlong Ma),

*liuqy@ms.giec.ac.cn (Qiyang Liu)*

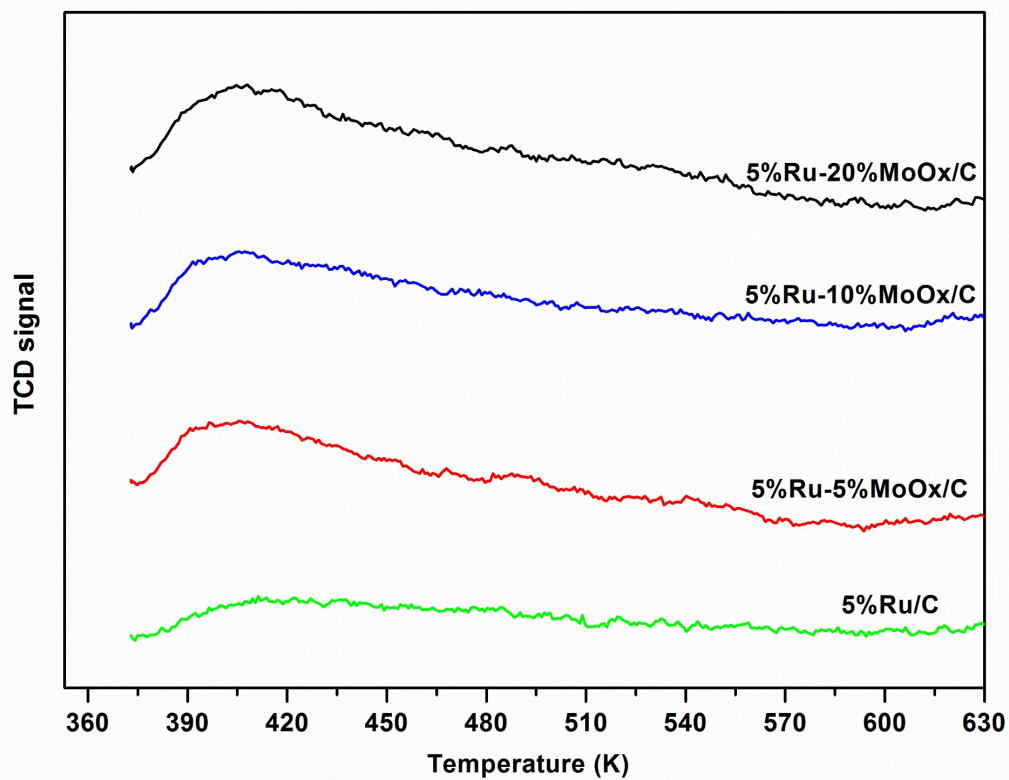

**Fig. S1** NH<sub>3</sub>-temperature-programmed desorption profiles of 5%Ru-20%MoOx/C, 5%Ru-10%MoOx/C, 5%Ru-5%MoOx/C and 5%Ru/C catalysts.

---

Table S1: the Acidity of of catalysts<sup>a</sup>

| Catalysts                   | Acidity(mmol/g) |
|-----------------------------|-----------------|
| 5%Ru-20%MoO <sub>x</sub> /C | 0.73            |
| 5%Ru-10%MoO <sub>x</sub> /C | 0.68            |
| 5%Ru-5%MoO <sub>x</sub> /C  | 0.57            |
| 5%Ru /C                     | 0.33            |

<sup>a</sup> NH<sub>3</sub>-TPD technique (total acidic amount)

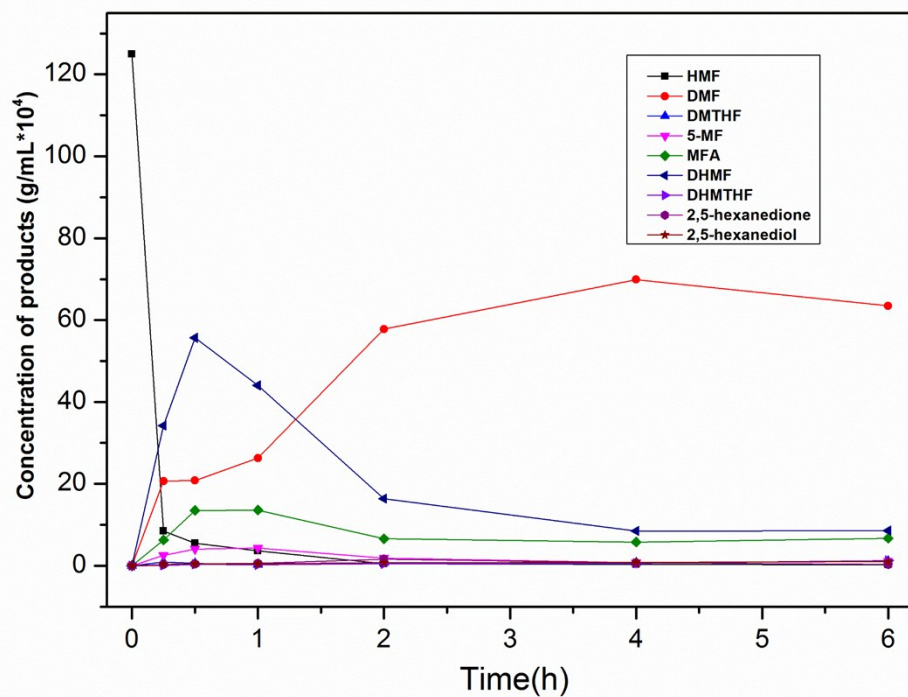

**Fig. S2** Effect of the concentration of products with time. Reaction condition: 120 °C, HMF 0.5 g, n-butyl alcohol 40 ml, 5%Ru-10%MoO<sub>x</sub>/C catalyst 0.1 g.
